# Supplementary material for: Right Ventricular Structure and Function in Young Adults Born Preterm at Very Low Birth Weight
Source: MDPI journal article supplement (doi:10.3390/jcm10214864), 2021-10-22
Supplement: s1 [file s1]

## Supplemental Data

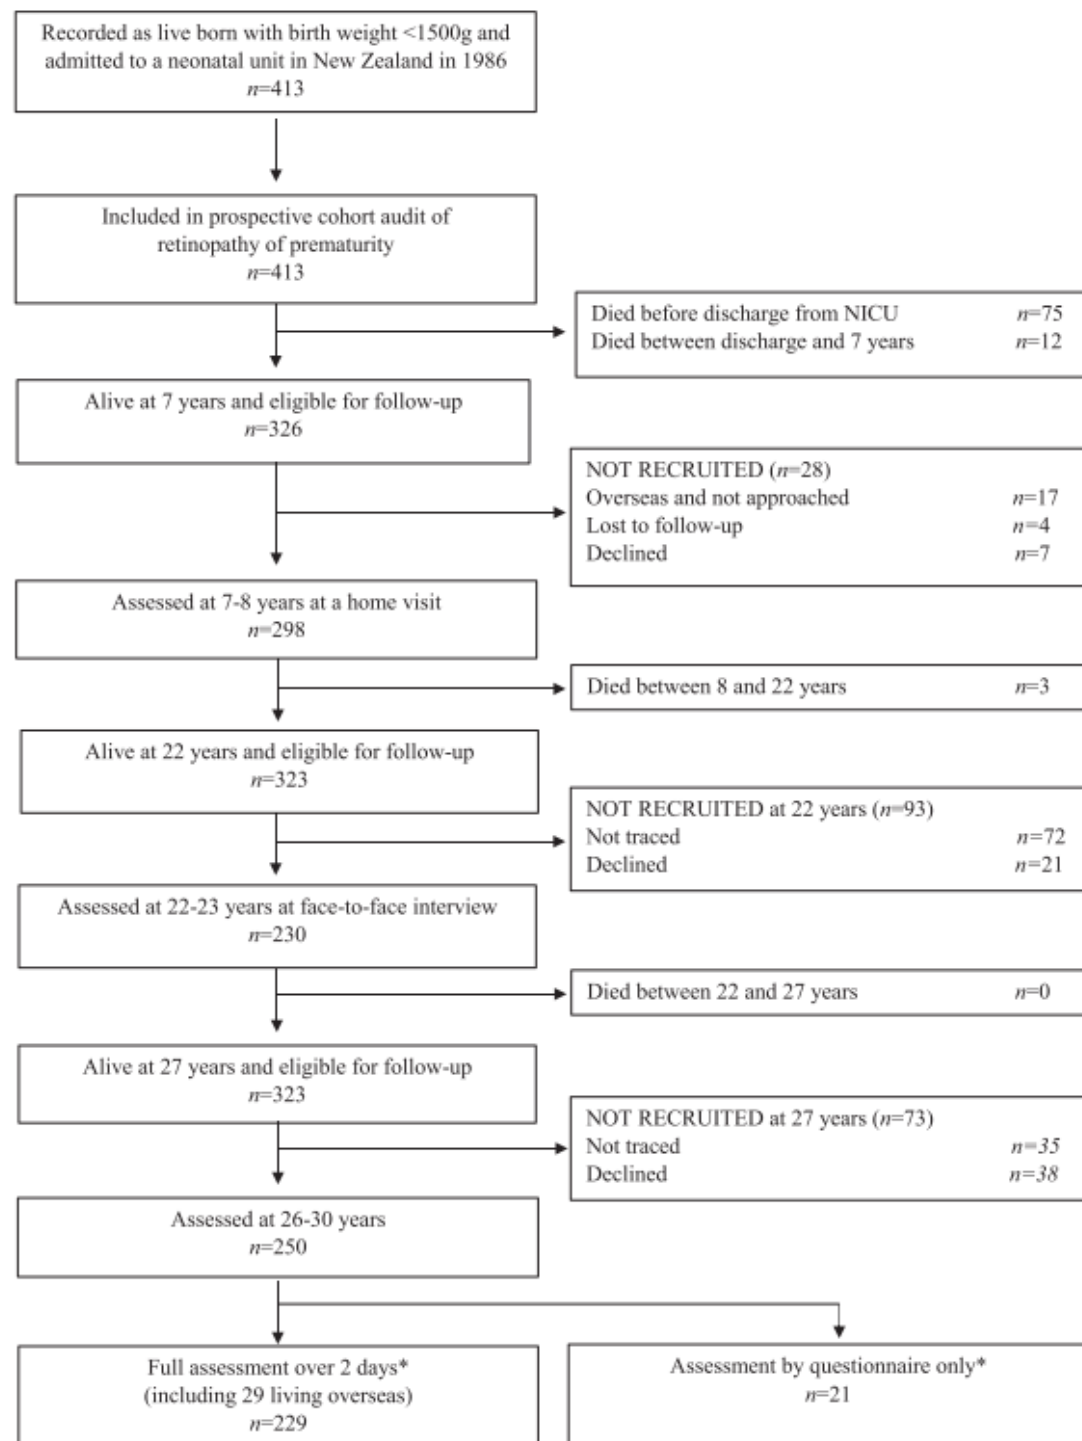

**Supplementary figure S1.** Flow diagram of recruitment and retention of VLBW participants. (Modified with permission from: Darlow BA, et al. Metabolic syndrome in very low birth weight young adults and controls: the New Zealand 1986 VLBW Study. *J Pediatr* 2019;206:128-33 133.e1). \*Between February 2013 and November 2016. NICU, neonatal intensive care unit.

|                                                                         | Strain<br>n = 176 | No strain<br>n = 153 | P      |
|-------------------------------------------------------------------------|-------------------|----------------------|--------|
| <b>Demographics</b>                                                     |                   |                      |        |
| Age at assessment. years                                                | 28.4 ± 1.1        | 28.2 ± 0.9           | 0.065* |
| Ethnicity n (%)                                                         |                   |                      |        |
| Māori/Pacific Island                                                    | 47(26.7)          | 49(32)               | 0.56   |
| Asian                                                                   | 3(1.7)            | 2(1.3)               |        |
| NZ European                                                             | 126(71.6)         | 102(66.7)            |        |
| Height cm                                                               | 169.4±9.0         | 169.1±9.5            | 0.88*  |
| Weight, kg                                                              | 75.3±15.4         | 78.0±22.3            | 0.150* |
| BMI kg/m <sup>2</sup>                                                   | 26.2±5.3          | 27.2±7.2             | 0.210* |
| BSA m <sup>2</sup>                                                      | 1.9±0.2           | 1.9±0.3              | 0.286* |
| Smokers n (%)                                                           | 45(27)            | 46(30)               | 0.41   |
| <b>Perinatal Characteristics</b>                                        |                   |                      |        |
| Birth weight g                                                          | 1177±226          | 1091±236             | 0.05*  |
| Birth weight <1kg n (%)                                                 | 26(15)            | 37(24)               | 0.03   |
| Gestation weeks                                                         | 29.7±2.6          | 28.8±2.3             | 0.005* |
| BPD n (%)                                                               | 23(20)            | 23(21)               | 0.89   |
| ANS n (%)                                                               | 50(43)            | 49(44)               | 0.92   |
| <b>Left Heart Function</b>                                              |                   |                      |        |
| LV Ejection Fraction %                                                  | 64.1±4.2          | 64.3±4.5             | 0.731* |
| End-diastolic volume, indexed to BSA (cm <sup>3</sup> /m <sup>2</sup> ) | 61.2±11.5         | 57.8±11.3            | 0.01*  |
| End-systolic volume, indexed to BSA (cm <sup>3</sup> /m <sup>2</sup> )  | 22±5.3            | 20.6±5.1             | 0.02*  |
| LV mass, indexed to BSA (g/m <sup>2</sup> )                             | 92.6±21.2         | 89.7±19.3            | 0.28*  |
| <b>Lung Function</b>                                                    |                   |                      |        |
| FEV1 z score                                                            | - 0.46±1.13       | -0.55±1.3            | 0.515* |
| FEV1/FVC z score                                                        | - 0.98±1          | -1.1±1.2             | 0.336* |
| DLCO z score                                                            | -0.53±1           | -0.53±1              | 0.99*  |

**Supplementary Table S1. Demographics, perinatal clinical characteristics and left heart variables in all subjects who had analysable strain compared to those who did not.**

Values are unadjusted mean ± standard deviation unless otherwise stated.

ANS -exposure to antenatal steroids; BMI indicates body mass index; BPD - bronchopulmonary dysplasia; BSA – body surface area; DLCO –Diffusing capacity for carbon monoxide; FEV1 – forced expiratory volume in 1 second; FVC – forced vital capacity; LV – left ventricle;

\*p value adjusted for sex

|                                                                   | BPD           | No BPD        | P    |
|-------------------------------------------------------------------|---------------|---------------|------|
| n*                                                                | 46 (20)       | 182 (80)      |      |
| <b>Right Ventricular Structure</b>                                |               |               |      |
| End diastolic area index cm <sup>2</sup>                          | 11.5 (0.4)    | 10.9 (0.2)    | 0.2  |
| End systolic area index cm <sup>2</sup>                           | 6.85 (0.26)   | 6.27 (0.12)   | 0.04 |
| RV basal diameter cm                                              | 3.1 (0.1)     | 3.07 (0.03)   | 0.69 |
| RV mid cavity diameter cm                                         | 3.2 (0.08)    | 2.26 (0.04)   | 0.51 |
| RV Length cm                                                      | 7.27 (0.11)   | 7.25 (0.06)   | 0.92 |
| Right atrial volume index cm <sup>2</sup>                         | 24.37 (0.97)  | 25.54 (0.5)   | 0.29 |
| Right atrial area index cm <sup>2</sup>                           | 7.36 (0.21)   | 7.39 (0.11)   | 0.92 |
| Right ventricular wall thickness mm                               | 0.36 (0.01)   | 0.38 (0.01)   | 0.12 |
| <b>Right Ventricular Function</b>                                 |               |               |      |
| TAPSE cm                                                          | 2.17 (0.03)   | 2.25 (0.03)   | 0.08 |
| Tissue doppler tricuspid lateral annular systolic velocity cm/sec | 12.62 (0.26)  | 12.54 (0.13)  | 0.78 |
| Fractional Area Change %                                          | 40.07 (1.2)   | 43.07 (0.56)  | 0.03 |
| RV myocardial performance index                                   | 0.47 (0.02)   | 0.44 (0.01)   | 0.15 |
| RV TDI e'/a'                                                      | 1.46 (0.07)   | 1.36 (0.04)   | 0.25 |
| End diastolic LV eccentricity index                               | 1.04 (0.01)   | 1.03 (0.01)   | 0.52 |
| End systolic LV eccentricity index                                | 1.022 (0.01)  | 1.013 (0.004) | 0.4  |
| <b>Right Ventricular Systolic Strain</b>                          |               |               |      |
| n                                                                 | 23            | 93            |      |
| Longitudinal endocardial freewall strain %                        | -26.3 (0.3)   | -26.76 (0.6)  | 0.49 |
| Global longitudinal endocardial strain %                          | -23.04 (0.56) | -23.67 (0.28) | 0.32 |
| Global radial strain %                                            | -26.9 (2.81)  | -29.8 (1.4)   | 0.36 |

**Supplementary table S2. RV structure, function and strain values in PT/VLBW subjects with and without a diagnosis of bronchopulmonary dysplasia (BPD)**

Values are sex adjusted mean (standard error) unless otherwise stated.

RV indicates right ventricle; LV Left ventricle

RV TDI e'/a' indicates right ventricular tissue doppler early (e')/ atrial (a') filling velocity ratio

\*total number VLBW participants but numbers for echocardiographic measurements ranged from 20 - 46 in those with BPD diagnosis and 130 – 182 in those without.

|                                                                   | ANS      | No ANS  | P    |
|-------------------------------------------------------------------|----------|---------|------|
| *n (%)                                                            | 129 (56) | 99 (43) |      |
| <b>Right Ventricular Structure</b>                                |          |         |      |
| End diastolic area index cm <sup>2</sup>                          | 10.9     | 11.2    | 0.34 |
| End systolic area index cm <sup>2</sup>                           | 6.32     | 6.44    | 0.58 |
| RV basal diameter cm                                              | 3.04     | 3.12    | 0.2  |
| RV mid cavity diameter cm                                         | 3.24     | 3.25    | 0.9  |
| RV Length cm                                                      | 7.26     | 7.26    | 0.99 |
| Right atrial volume index cm <sup>2</sup>                         | 25       | 25.7    | 0.41 |
| Right atrial area index cm <sup>2</sup>                           | 7.3      | 7.49    | 0.34 |
| Right ventricular wall thickness mm                               | 0.38     | 0.38    | 0.87 |
| <b>Right Ventricular Function</b>                                 |          |         |      |
| TAPSE cm                                                          | 2.2      | 2.3     | 0.19 |
| Tissue doppler tricuspid lateral annular systolic velocity cm/sec | 12.4     | 12.8    | 0.09 |
| Fractional Area Change %                                          | 42       | 43.2    | 0.25 |
| RV myocardial performance index                                   | 0.46     | 0.43    | 0.1  |
| RV TDI e'/a'                                                      | 1.36     | 1.41    | 0.45 |
| End diastolic LV eccentricity index                               | 1.04     | 1.03    | 0.41 |
| End systolic LV eccentricity index                                | 1.02     | 1.02    | 0.28 |
| <b>Right Ventricular Systolic Strain</b>                          |          |         |      |
| n                                                                 | 66       | 50      |      |
| Longitudinal endocardial freewall strain %                        | -26.2    | -27.2   | 0.07 |
| Global longitudinal endocardial strain %                          | -23.4    | -23.8   | 0.41 |
| Global radial strain %                                            | -30.4    | -27.7   | 0.6  |

**Supplementary table S3. RV structure, function and strain values in PT/VLBW subjects with and without exposure to antenatal steroid (ANS)**

Values are sex adjusted mean unless otherwise stated.

RV indicates right ventricle; LV – left ventricle

RV TDI e'/a' indicates right ventricular tissue doppler early (e')/ atrial (a') filling velocity ratio

\*Total number VLBW participants but numbers for echocardiographic measurements ranged f81-127 in those who were exposed to ANS and 67-99 in those who weren't.
